# Supplementary material for: Environmental risk-based ranking of solvents using the combination of a multimedia model and multi-criteria decision analysis
Source: Royal Society of Chemistry journal article supplement (doi:10.1039/c6gc03424a), 2016-12-17
Supplement: c6gc03424a1.pdf [file c6gc03424a1.pdf]

Electronic Supplementary Information

**Environmental risk – based ranking of solvents by the combination of multimedia model and multi-criteria decision analysis.**

Marek Tobiszewski,<sup>a†</sup> Jacek Namieśnik<sup>a</sup> and Francisco Pena-Pereira<sup>b</sup>

*a. Department of Analytical Chemistry, Chemical Faculty, Gdańsk University of Technology (GUT), 11/12 G. Narutowicza St., 80-233 Gdańsk, Poland*

*b. Department of Analytical and Food Chemistry, Faculty of Chemistry, University of Vigo, Campus As Lagoas - Marcosende s/n, 36310 Vigo, Spain*

† author for correspondence: [marektobiszewski@wp.pl](mailto:marektobiszewski@wp.pl)

*Statement:* For the same data point different literature values can be found.\* We tried to find the data originating from reliable sources, collecting preferably experimental data not modelled or estimated. Because of the literature data variability, it is possible to find (sometimes significantly) another values in various sources.

ESI Table 1. Parameters used for the assessment procedure.

| Chemical group | No. | Compound    | molar weight [g/mole] | CAS number | Inhalation LC <sub>50</sub> [ppm] | POCP | fish LC <sub>50</sub> [mg L <sup>-1</sup> ] | log BCF | Biodegradability half-life [day] | Oral LD <sub>50</sub> [mg kg <sup>-1</sup> ] | EPA/IACR cancer class |
|----------------|-----|-------------|-----------------------|------------|-----------------------------------|------|---------------------------------------------|---------|----------------------------------|----------------------------------------------|-----------------------|
| hydrocarbons   | 1   | pentane     | 72                    | 109-66-0   | 123000                            | 39.5 | 10                                          | 0       | 3                                | 5000                                         | 0                     |
|                | 2   | hexane      | 86                    | 110-54-3   | 48000                             | 48.2 | 2.5                                         | 0.35    | 1                                | 25000                                        | 0                     |
|                | 3   | cyclohexane | 84                    | 110-82-7   | 34000                             | 23   | 4.3                                         | 2.38    | 28                               | 12700                                        | 0                     |
|                | 4   | heptane     | 100                   | 142-82-5   | 103000                            | 49.4 | 375                                         | 2.53    | 7                                | 5000                                         | 0                     |
|                | 5   | octane      | 114                   | 111-65-9   | 25260                             | 46.1 | 100                                         | 3.289   | 7                                | 5000                                         | 0                     |
|                | 6   | isooctane   | 114                   | 540-84-1   | 3100                              | 45   | 0.1                                         | 2.36    | 1                                | 5000                                         | 0                     |
|                | 7   | nonane      | 128                   | 111-84-2   | 3200                              | 41.4 | 300                                         | 2.651   | 7                                | 4000                                         | 0                     |
|                | 8   | decane      | 142                   | 124-18-5   | 2738                              | 38.4 | 500                                         | 2.158   | 7                                | 5000                                         | 0                     |

| Chemical group | No. | Compound           | molar weight [g/mole] | CAS number | Inhalation LC <sub>50</sub> [ppm] | POCP  | fish LC <sub>50</sub> [mg L <sup>-1</sup> ] | log BCF | Biodegradability half-life [day] | Oral LD <sub>50</sub> [mg kg <sup>-1</sup> ] | EPA/IACR cancer class |
|----------------|-----|--------------------|-----------------------|------------|-----------------------------------|-------|---------------------------------------------|---------|----------------------------------|----------------------------------------------|-----------------------|
|                | 9   | undecane           | 156                   | 1120-21-4  | 844                               | 38.4  | 1000                                        | 2.722   | 28                               | 5000                                         | 0                     |
|                | 10  | dodecane           | 170                   | 112-40-3   | 284                               | 31.1  | 1000                                        | 2.497   | 7                                | 5000                                         | 0                     |
|                | 11  | benzene            | 78                    | 71-43-2    | 13000                             | 21.8  | 5.9                                         | 1.5     | 6                                | 930                                          | 10                    |
|                | 12  | toluene            | 92                    | 108-88-3   | 26000                             | 63.7  | 7.63                                        | 1.954   | 3                                | 5500                                         | 0                     |
|                | 13  | o-xylene           | 106                   | 95-47-6    | 6125                              | 105.3 | 17                                          | 1.702   | 4                                | 4300                                         | 0                     |
|                | 14  | m-xylene           | 106                   | 108-38-3   | 6700                              | 47.4  | 11                                          | 1.764   | 24                               | 5000                                         | 0                     |
|                | 15  | p-xylene           | 106                   | 106-42-3   | 5000                              | 47.2  | 16                                          | 1.3     | 7                                | 2100                                         | 0                     |
|                | 16  | styrene            | 104                   | 100-42-5   | 9500                              | 14.2  | 10                                          | 1.13    | 28                               | 5000                                         | 8                     |
| alcohols       | 17  | methanol           | 32                    | 67-56-1    | 64000                             | 14    | 15400                                       | 0.65    | 1                                | 1200                                         | 0                     |
|                | 18  | ethanol            | 46                    | 64-17-5    | 20000                             | 39.9  | 14500                                       | -1.63   | 2                                | 3450                                         | 0                     |
|                | 19  | 1-propanol         | 60                    | 71-23-8    | 68000                             | 56.1  | 4480                                        | -1.07   | 3                                | 1870                                         | 0                     |
|                | 20  | isopropanol        | 60                    | 67-63-0    | 16000                             | 18.8  | 5000                                        | 0.5     | 1                                | 3600                                         | 0                     |
|                | 21  | 1-butanol          | 74                    | 71-36-3    | 8000                              | 62    | 1200                                        | -0.439  | 7                                | 790                                          | 0                     |
|                | 22  | isobutanol         | 74                    | 67-63-0    | 8000                              | 44.7  | 1220                                        | 0.5     | 7                                | 2460                                         | 0                     |
|                | 23  | sec-butyl alcohol  | 74                    | 78-92-2    | 16500                             | 44.7  | 3670                                        | 0.5     | 7                                | 2193                                         | 0                     |
|                | 24  | tert-butyl alcohol | 74                    | 76-65-0    | 3300                              | 10.6  | 1940                                        | -1.45   | 7                                | 2743                                         | 0                     |
|                | 25  | 1-pentanol         | 88                    | 71-41-0    | 6000                              | 59.5  | 370                                         | 0.463   | 4                                | 2200                                         | 0                     |
|                | 26  | 1-hexanol          | 102                   | 111-27-3   | 5000                              | 45    | 98                                          | 0.711   | 5                                | 720                                          | 0                     |
|                | 27  | 1-heptanol         | 116                   | 111-70-6   | 9333                              | 45    | 38                                          | 1.09    | 20                               | 5500                                         | 0                     |
|                | 28  | 1-octanol          | 130                   | 111-87-5   | 6500                              | 45    | 13.3                                        | 1.6     | 30                               | 3200                                         | 0                     |
|                | 29  | 1-nonanol          | 144                   | 143-08-8   | 6500                              | 45    | 18                                          | 2.2     | 40                               | 3560                                         | 0                     |
|                | 30  | allyl alcohol      | 58                    | 107-18-6   | 76                                | 45    | 0.32                                        | 0.5     | 3                                | 64                                           | 0                     |
|                | 31  | benzyl alcohol     | 108                   | 100-51-6   | 1000                              | 45    | 10                                          | 0.602   | 5                                | 1230                                         | 0                     |
|                | 32  | glycerol           | 92                    | 56-81-5    | n.a. <sup>†</sup>                 | 22    | 5800                                        | 0.5     | 4                                | 25000                                        | 0                     |
|                | 33  | phenol             | 94                    | 108-95-2   | 82                                | -119  | 12                                          | 2.2     | 2                                | 270                                          | 0                     |
|                | 34  | o-cresol           | 108                   | 95-45-7    | 40                                | 19    | 6.2                                         | 1.1     | 2                                | 121                                          | 0                     |

| Chemical group | No. | Compound                  | molar weight [g/mole] | CAS number | Inhalation LC <sub>50</sub> [ppm] | POCP | fish LC <sub>50</sub> [mg L <sup>-1</sup> ] | log BCF | Biodegradability half-life [day] | Oral LD <sub>50</sub> [mg kg <sup>-1</sup> ] | EPA/IACR cancer class |
|----------------|-----|---------------------------|-----------------------|------------|-----------------------------------|------|---------------------------------------------|---------|----------------------------------|----------------------------------------------|-----------------------|
|                | 35  | m-cresol                  | 108                   | 108-39-4   | 160                               | 19   | 8.9                                         | 3       | 2                                | 242                                          | 0                     |
|                | 36  | p-cresol                  | 108                   | 106-44-5   | 160                               | 19   | 7.9                                         | 1.26    | 2                                | 207                                          | 0                     |
| ethers         | 37  | diethyl ether             | 74                    | 60-29-7    | 32000                             | 44.5 | 2560                                        | 0.73    | 1                                | 1215                                         | 0                     |
|                | 38  | methyl – tert butyl ether | 88                    | 1634-04-4  | 23500                             | 15.2 | 672                                         | 1.5     | 500                              | 4000                                         | 0                     |
|                | 39  | furan                     | 68                    | 110-00-9   | 60                                | 20   | 61                                          | 0.332   | 300                              | 5                                            | 8                     |
|                | 40  | tetrahydrofuran           | 72                    | 109-99-9   | 18000                             | 20   | 2160                                        | 0       | 40                               | 1650                                         | 0                     |
| aldehydes      | 41  | ethanal                   | 44                    | 75-07-0    | 13300                             | 64.1 | 31                                          | 0.5     | 15                               | 661                                          | 8                     |
|                | 42  | 1-propanal                | 58                    | 123-38-6   | 1110                              | 17   | 14                                          | 0.5     | 11                               | 1410                                         | 0                     |
|                | 43  | 1-butanal                 | 72                    | 123-72-8   | 6400                              | 17.1 | 16                                          | 0.5     | 5                                | 5900                                         | 0                     |
|                | 44  | furfural                  | 96                    | 98-08-1    | 100                               | 17   | 32                                          | 0.5     | 5                                | 65                                           | 0                     |
| ketones        | 45  | acetone                   | 58                    | 67-64-1    | 21000                             | -4   | 5540                                        | -0.187  | 3                                | 3200                                         | 0                     |
|                | 46  | 2-butanone                | 72                    | 78-93-3    | 10900                             | 37.3 | 3220                                        | 0       | 11                               | 2737                                         | 0                     |
|                | 47  | 2-pentanone               | 86                    | 107-87-9   | 2000                              | 17.8 | 1240                                        | 0.477   | 7                                | 1600                                         | 7                     |
|                | 48  | 3-pentanone               | 86                    | 96-22-0    | 5000                              | 16   | 1530                                        | 0.3     | 7.5                              | 2140                                         | 0                     |
|                | 49  | methyl isobutyl ketone    | 100                   | 108-10-1   | 3000                              | 49   | 720                                         | 0.5     | 11                               | 2080                                         | 7                     |
|                | 50  | 2-hexanone                | 100                   | 591-78-6   | 8000                              | 57.2 | 428                                         | 0.778   | 5                                | 2590                                         | 0                     |
|                | 51  | 2-heptanone               | 114                   | 110-43-0   | 8000                              | 59.9 | 130                                         | 0.39    | 21                               | 1760                                         | 0                     |
|                | 52  | cyclohexanone             | 98                    | 108-94-1   | 8000                              | 12   | 527                                         | 0.5     | 7                                | 1620                                         | 0                     |
| terpenes       | 53  | d-limonene                | 136                   | 5989-27-5  | 5000                              | 134  | 0.72                                        | 2.673   | 7                                | 4400                                         | 0                     |
|                | 54  | p-cymene                  | 134                   | 99-87-6    | 1750                              | 100  | 48                                          | 2.457   | 14                               | 4750                                         | 0                     |
|                | 55  | α-pinene                  | 136                   | 80-56-8    | 1110                              | 84   | 0.28                                        | 2.719   | 21                               | 3700                                         | 0                     |
|                | 56  | β-pinene                  | 136                   | 127-91-3   | 3500                              | 70   | 1                                           | 2.503   | 21                               | 4700                                         | 0                     |
| organic acids  | 57  | formic acid               | 46                    | 64-18-6    | 825                               | 4    | 46                                          | 0       | 1                                | 730                                          | 0                     |
|                | 58  | acetic acid               | 60                    | 64-19-7    | 16000                             | 6    | 1000                                        | 0       | 2                                | 3310                                         | 0                     |
|                | 59  | butyric acid              | 88                    | 107-92-6   | 2200                              | 8    | 66.4                                        | 0.5     | 2                                | 2940                                         | 0                     |
|                | 60  | isobutyric acid           | 88                    | 79-31-2    | 2800                              | 8    | 228                                         | 0.5     | 3                                | 226                                          | 0                     |

| Chemical group | No. | Compound             | molar weight [g/mole] | CAS number | Inhalation LC <sub>50</sub> [ppm] | POCP | fish LC <sub>50</sub> [mg L <sup>-1</sup> ] | log BCF | Biodegradability half-life [day] | Oral LD <sub>50</sub> [mg kg <sup>-1</sup> ] | EPA/IACR cancer class |
|----------------|-----|----------------------|-----------------------|------------|-----------------------------------|------|---------------------------------------------|---------|----------------------------------|----------------------------------------------|-----------------------|
|                | 61  | valeric acid         | 102                   | 109-52-4   | 1000                              | 8    | 39                                          | 0.5     | 4                                | 600                                          | 0                     |
|                | 62  | hexanoic acid        | 116                   | 142-62-1   | 865                               | 8    | 88                                          | 0.5     | 5                                | 1900                                         | 0                     |
| esters         | 63  | ethyl acetate        | 88                    | 141-78-6   | 8000                              | 10   | 350                                         | 1.48    | 5                                | 5620                                         | 0                     |
|                | 64  | ethyl acrylate       | 100                   | 140-88-5   | 1414                              | 18   | 4.6                                         | 0.316   | 18                               | 800                                          | 8                     |
|                | 65  | butyl lactate        | 146                   | 138-22-7   | 840                               | 18   | 75                                          | 0.5     | 10                               | 5000                                         | 0                     |
|                | 66  | ethyl lactate        | 188                   | 97-64-3    | 1120                              | 0    | 320                                         | 0.5     | 14                               | 2500                                         | 0                     |
|                | 67  | methyl formate       | 60                    | 107-31-3   | 2120                              | 0    | 120                                         | 0.5     | 2                                | 1622                                         | 0                     |
|                | 68  | methyl acetate       | 74                    | 79-20-9    | 16200                             | 5.9  | 300                                         | 0.5     | 21                               | 5000                                         | 0                     |
|                | 69  | methyl laurate       | 214                   | 111-82-0   | 571                               | 0    | 0.52                                        | 2.466   | 5                                | 2000                                         | 0                     |
| chlorinated    | 70  | dichloromethane      | 85                    | 75-09-2    | 16000                             | 2.3  | 193                                         | 0.7     | 10                               | 1600                                         | 8                     |
|                | 71  | chloroform           | 119                   | 67-66-3    | 15000                             | 0.4  | 14                                          | 0.8     | 28                               | 908                                          | 8                     |
|                | 72  | carbon tetrachloride | 154                   | 56-23-5    | 8000                              | 15   | 24.3                                        | 1.47    | 250                              | 2350                                         | 8                     |
|                | 73  | trichloroethene      | 131                   | 79-01-6    | 8450                              | 32.5 | 3.1                                         | 1.23    | 180                              | 2400                                         | 10                    |
|                | 74  | tetrachloro-ethene   | 166                   | 127-18-4   | 4100                              | 1.4  | 9.8                                         | 1.69    | 230                              | 2629                                         | 8                     |
|                | 75  | 1,2-dichloro-ethane  | 111                   | 542-75-6   | 950                               | 15   | 2.94                                        | 0.863   | 28                               | 250                                          | 7                     |
|                | 76  | 1,3-dichloro-propene | 261                   | 87-68-3    | 34                                | 15   | 0.14                                        | 4.7     | 205                              | 82                                           | 7                     |
|                | 77  | hexachlorobutadiene  | 99                    | 107-06-2   | 1414                              | 15   | 136                                         | 0.3     | 180                              | 413                                          | 7                     |
| others         | 78  | acetonitrile         | 41                    | 75-05-8    | 3587                              | 25   | 1640                                        | 0.3     | 28                               | 1320                                         | 0                     |

IARC cancer class was translated into the numerical values in the following way: Group 1 (human carcinogen) – 10; Group 2A (probable human carcinogen) – 8; Group 2B (possible human carcinogen) – 7; Groups 3 and 4 (not classifiable and probable human noncarcinogen, respectively) – 0.

#### Notes and references:

\* C.M. Alder, J. D. Hayler, R.K. Henderson, A.M. Redman, L. Shukla, L.E. Shuster, H.F. Sneddon, Green Chem. 2016,18, 3879-3890.

† Not needed as glycerol does not partition to air
